# Supplementary material
Source: publisher site journal article supplement (https://mbmg.pensoft.net/article/download/suppl/3929932/)
Supplement: Supplementary file 1

## Sheet: Sheet1
Table S5. Abundance of some common fish species obtained by the direct visual census
Census date	Takifugu niphobles	Enguraulis japonicus	Takifugu poecilonotus	Acanthopagrus schlegelii	Dictyosoma burgeri	Trachurus japonicus	Pagrus major	Sphyraena pinguis	Sardinops melanostictus	Girella punctata
2015-04-08	0	0	1	2	0	0	0	0	0	0
2015-04-23	0	0	1	5	0	0	0	0	0	0
2015-05-01	0	0	0	0	0	0	0	0	0	0
2015-05-26	1	0	1	2	0	0	0	0	0	0
2015-06-02	0	0	1	2	0	0	0	0	0	1
2015-06-24	0	0	0	3	0	107	8	0	0	0
2015-07-07	0	0	1	1	0	408	16	0	0	0
2015-07-22	1	0	1	5	0	305	25	0	200	0
2015-08-03	0	0	2	3	0	250	13	0	500	73
2015-08-25	0	0	3	11	0	200	3	170	0	30
2015-09-10	1	0	3	2	0	450	3	0	0	13
2015-09-30	2	0	2	3	0	410	4	0	0	0
2015-10-07	2	0	2	3	0	200	5	0	0	0
2015-10-22	1	0	1	1	0	100	4	0	0	20
2015-11-04	0	0	0	0	0	80	1	0	0	0
2015-11-27	0	750	1	1	0	100	0	0	0	0
2015-12-08	1	300	0	1	0	200	2	0	0	0
2015-12-22	0	0	0	1	0	50	0	0	0	0
2016-01-05	0	0	1	1	0	30	1	0	0	0
2016-01-18	0	50	0	1	0	50	0	0	0	0
2016-02-12	0	20	1	0	0	0	0	0	0	0
2016-02-22	1	0	0	1	1	0	0	0	0	0
2016-03-02	0	50	0	3	1	0	0	0	0	0
2016-03-31	0	0	1	0	0	0	0	0	0	0
